# Supplementary material
Source: Royal Society of Chemistry journal article supplement (doi:10.1039/d6ta01922f)
Supplement: d6ta01922f1.pdf [file d6ta01922f1.pdf]

## Electronic Supplementary Information

### **Nanodiamond-based TiO<sub>2</sub> Nanocomposite Separators for Enhancing Performance of Flexible Paper-based Supercapacitors**

Abhinandan Patra<sup>1</sup>, Hamed Javanbakht Lomeri<sup>1</sup>, Francesca De Rossi<sup>1</sup>, Jiri Henych<sup>2</sup>, Zuzana Nemeckova<sup>2</sup>, Oleksandr Romanyuk<sup>3</sup>, Stepan Stehlik<sup>3</sup>, Bohuslav Rezek<sup>4</sup>, Francesca Brunetti<sup>1\*</sup>

<sup>1</sup>*University of Rome Tor Vergata-CHOSE, Department of Electronic Engineering, via del politecnico 1, 00133 Rome, Italy*

<sup>2</sup>*Institute of Inorganic Chemistry, Czech Academy of Sciences, 250 68 Husinec-Řež, Czechia*

<sup>3</sup>*Institute of Physics, Czech Academy of Sciences, Cukrovarnická 10, 162 00 Prague 6, Czechia*

<sup>4</sup>*Faculty of Electrical Engineering, Czech Technical University in Prague, Technická 2, 166 27 Prague 9, Czechia*

Email id\*: [francesca.brunetti@uniroma2.it](mailto:francesca.brunetti@uniroma2.it)

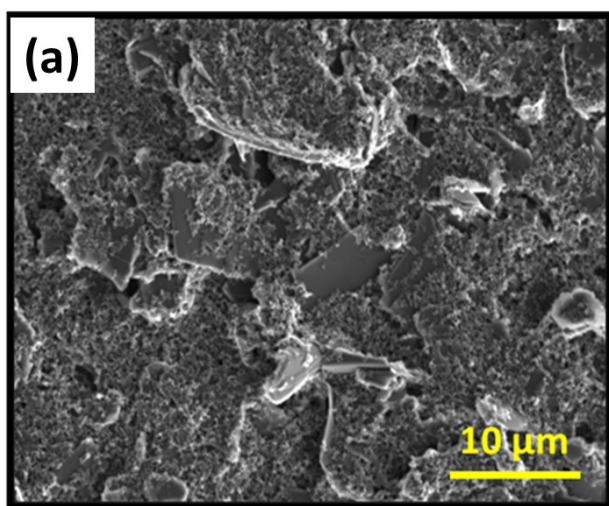

**Figure S1:** SEM images of the carbon electrodes.

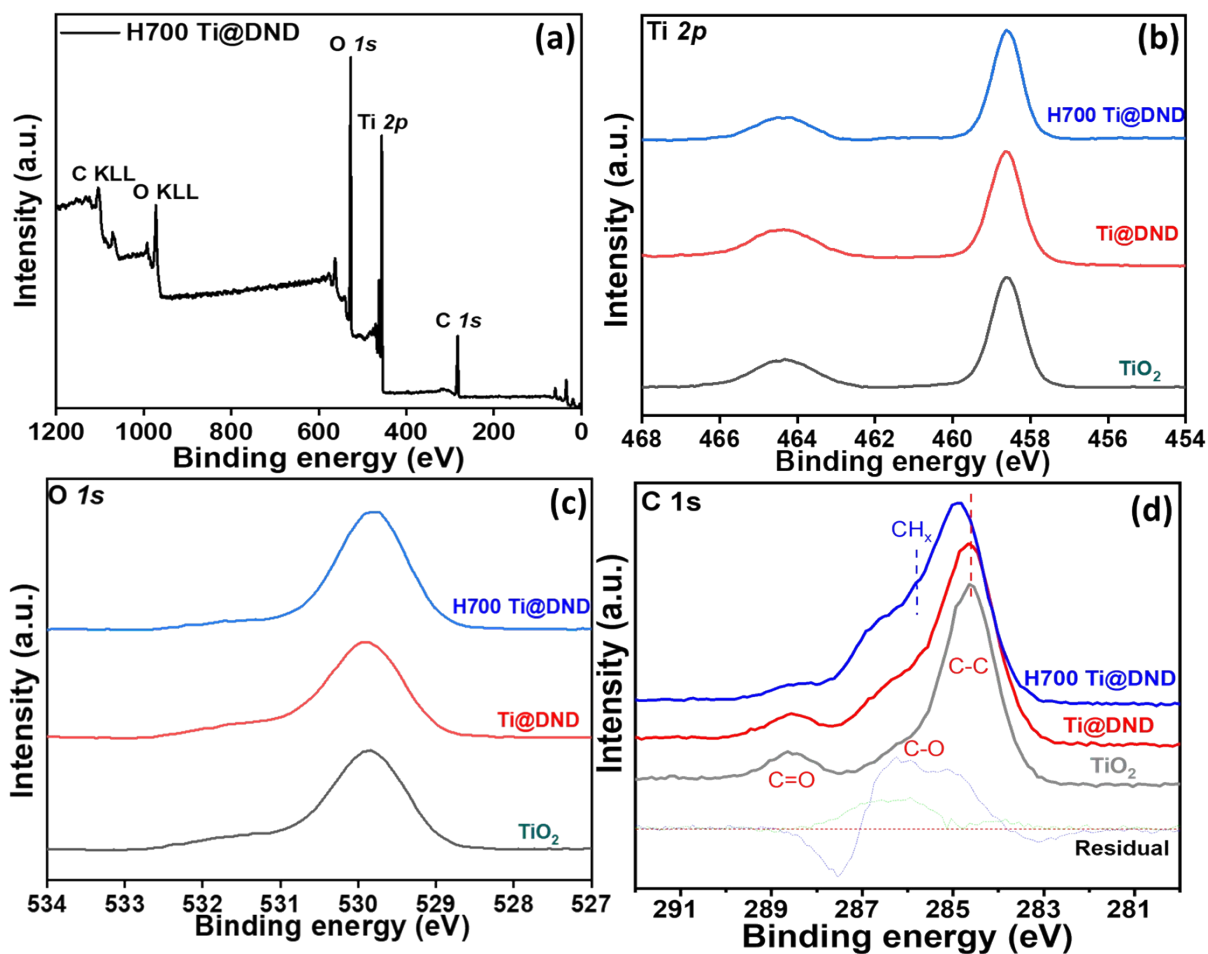

**Figure S2:** (a) Survey spectra of H700 Ti@DND. Comparative spectra of TiO<sub>2</sub>, Ti@DND and H700 Ti@DND of (b) Ti 2*p*, (c) O 1*s*, and (d) C 1*s* peaks.

| Sample           | Atomic concentration, at. % |                     |      |      |     | O/Ti |
|------------------|-----------------------------|---------------------|------|------|-----|------|
|                  | C <sub>adv</sub>            | C <sub>adv</sub> -O | Ti   | O    | N   |      |
| TiO <sub>2</sub> | 18.2                        | 10.4                | 21.0 | 49.5 | 0.9 | 1.9  |
| Ti@DND           | 25.9                        | 9.5                 | 18.5 | 45.3 | 0.8 | 1.9  |
| H700 Ti@DND      | 33.5                        | 8.4                 | 17.6 | 40.0 | 0.5 | 1.8  |

**Table ST1:** Atomic concentration of Ti, N and O in TiO<sub>2</sub>, Ti@DND and H700 Ti@DND.

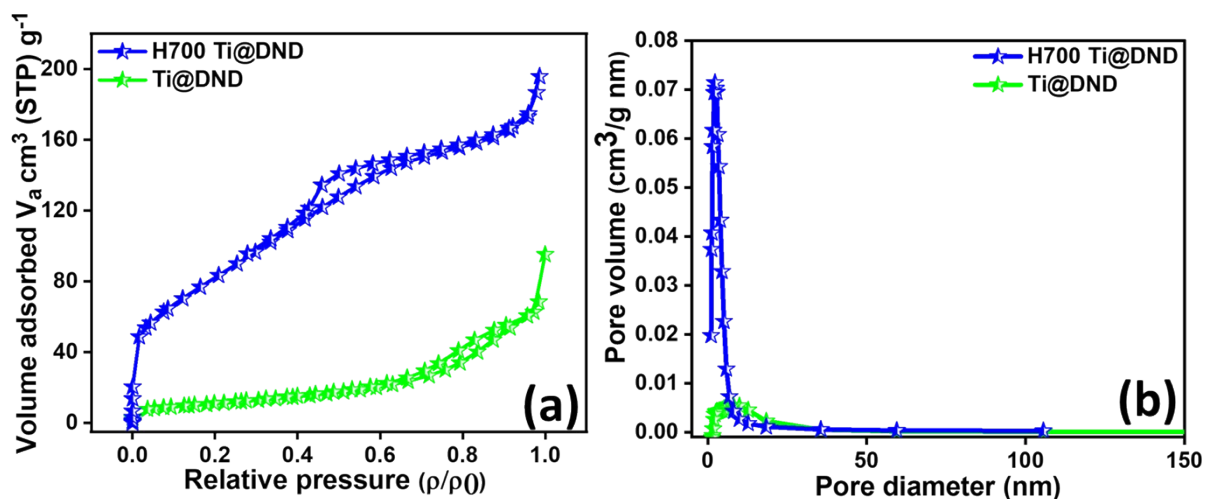

**Figure S3:** (a) BET surface area analysis of Ti@DND and H700 Ti@DND and (b) image showing the graph of pore size distribution of both the samples.

| Sample name | Surface area (m <sup>2</sup> /g) | Pore diameter (nm) | Pore volume (cm <sup>3</sup> /g) |
|-------------|----------------------------------|--------------------|----------------------------------|
| Ti@DND      | 309                              | 3.92               | 0.302                            |
| H700 Ti@DND | 40                               | 12.9               | 0.129                            |

**Table ST2:** Values of surface area, pore diameter and pore volume of Ti@DND and H700 Ti@DND samples.

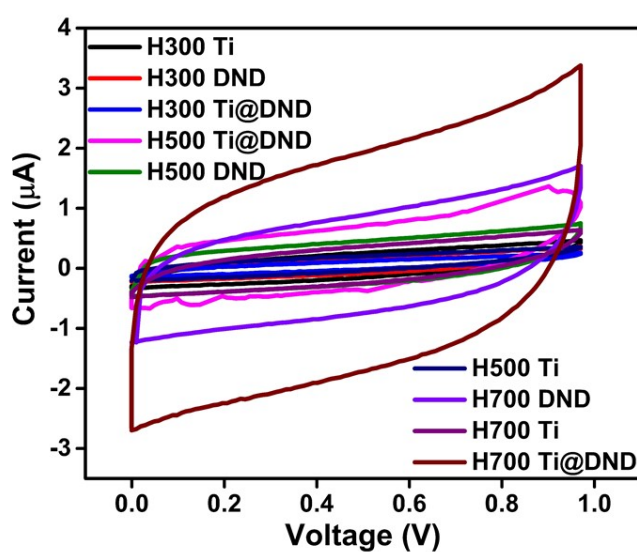

**Figure S4:** CV curves of all the hydrogenated samples at a constant scan rate of 100 mV/s.

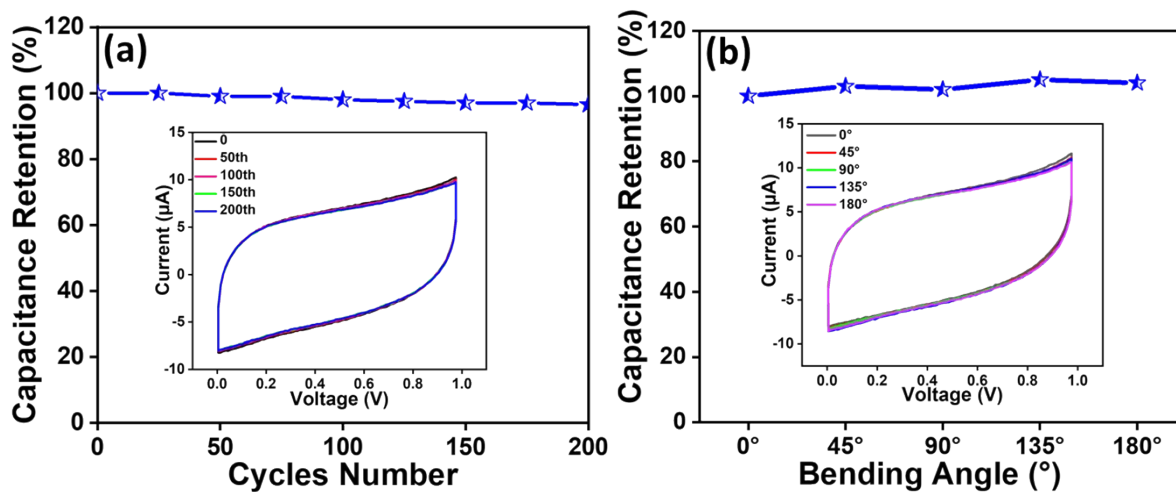

**Figure S5:** Flexibility test: (a) capacitance retention after 200 bending cycles, inset CVs at different bending cycles and (b) capacitance retention with various bending angles, inset showing CVs at different angles

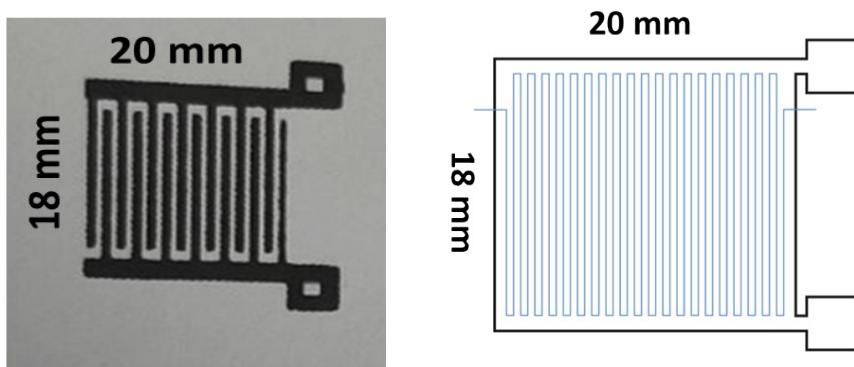

**Figure S6:** Photograph and patterning scheme of the supercapacitor electrodes.
